# Supplementary material
Source: PubMed Central journal article supplement (PMC3674069)
Supplement: cc-12-1416-s01.pdf [file cc-12-1416-s01.pdf]

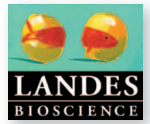

## **Supplemental Material to:**

**Matthew G. Andrusiak, Renaud Vandebosch, Fred A. Dick, David S. Park and Ruth S. Slack**

**LXCXE-independent chromatin remodeling by Rb/E2f  
mediates neuronal quiescence**

**2013; 12(9)**

**<http://dx.doi.org/10.4161/cc.24527>**

**<http://www.landesbioscience.com/journals/cc/article/24527>**

Figure S1

A

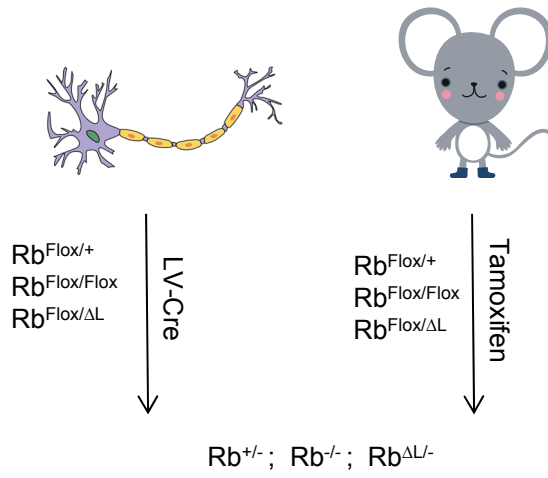

B

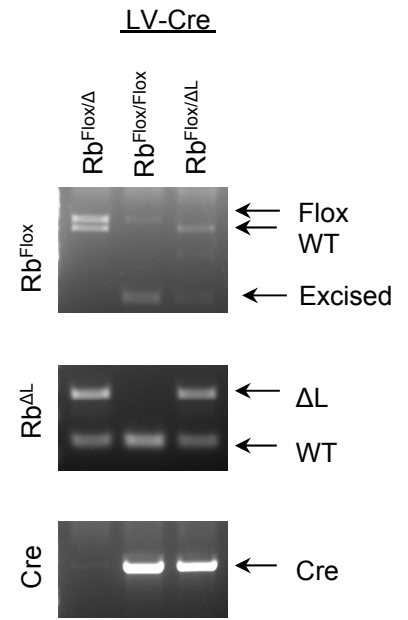

Figure S2

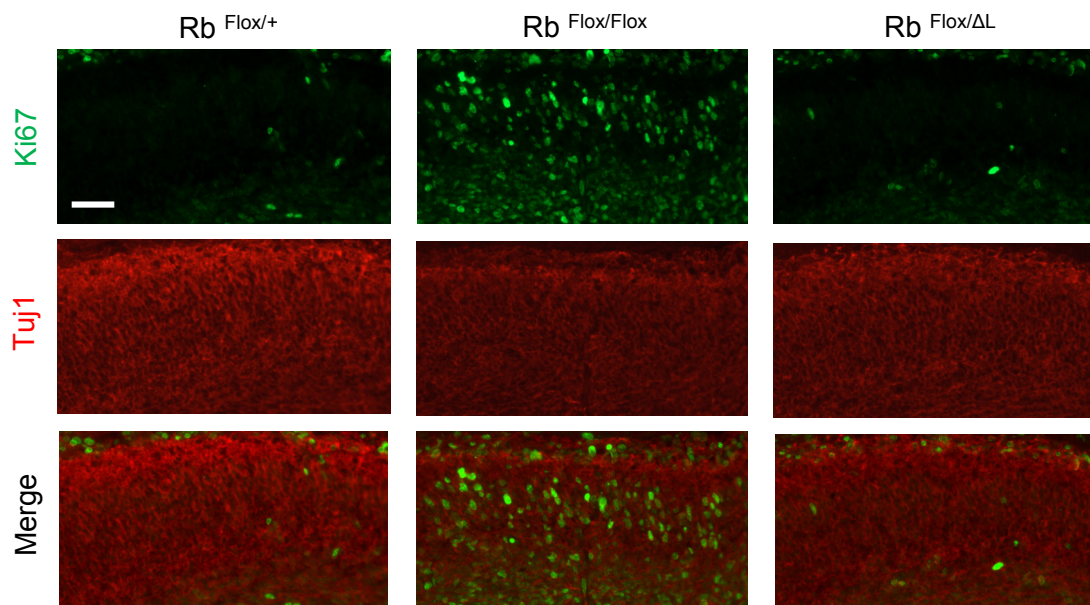

**Figure S1.** *Acute Rb LXCXE-binding domain deletion model* A) Representation of our *in vitro* and *in vivo* acute Rb<sup>ΔLXCXE</sup> model B) PCR genotyping analysis of neurons of the indicated genotypes. Genotyping was performed for the presence of Cre, Rb<sup>ΔL</sup> mutation and the floxed allele of Rb (intact and excised forms).

**Figure S2.** *Rb regulates the establishment of neuronal quiescence in an LXCXE independent manner.* Timed pregnant females were euthanized at E15.5. Representative pictures displaying ectopic proliferation (Ki67+) in immature neurons (Tuj1+) in the dorsal cortex of Foxg1-Cre; Rb<sup>Flox/Flox</sup> mice compared to Foxg1-Cre; Rb<sup>Flox/+</sup> and Foxg1-Cre; Rb<sup>Flox/ΔL</sup> mice. Scale bar: 100μm
